# Supplementary material
Source: publisher site journal article supplement (http://edge.sagepub.com/sites/default/files/Appendix%20A_Campbell%20County%20Middle%20School%20Counseling%20Program%20Beliefs.pdf)
Supplement: Supplementary file 1 [file Appendix%20A_Campbell%20County%20Middle%20School%20Counseling%20Program%20Beliefs.pdf]

## CAMPBELL COUNTY MIDDLE SCHOOL COUNSELING PROGRAM BELIEFS

The school counselors at Campbell County Middle School believe:

- All students have significance and worth.
- All students—regardless of ability, age, gender, ethnicity, or sexual orientation—shall have equal access to all services (academic, career, and personal/social) provided by the counseling program and the school.
- All students have strengths that can be applied to achieve their goals.
- All students learn best when positive relationships are present and fostered by all educational stakeholders.
- School counselors must be advocates for every student.
- School counselors are leaders and change agents in school culture and academic achievement.
- School counselors develop positive relationships and recognize each student's special talents to help them achieve goals.
- The school counseling program collaborates with educational stakeholders to increase equity and access to opportunity.
- The school counseling program serves a central role in meeting students' developmental needs through interventions in academic, career, and personal/social domains.
- The school counseling program focuses on student learning and utilizes a data-driven comprehensive school counseling program to meet the needs of every student.
- The comprehensive school counseling program is tailored to meet students' developmental needs as identified through needs assessments, delivered using evidence-based programs, and evolved through data analysis of outcomes.
- The school counseling program utilizes the American School Counselor Association ethical standards.

Retrieved from the companion website for *Facilitating Evidence-Based, Data-Driven School Counseling: A Manual for Practice* by Brett Zyromski and Melissa A. Mariani. Thousand Oaks, CA: Corwin, [www.corwin.com](http://www.corwin.com). Reproduction authorized only for the local school site or nonprofit organization that has purchased this book.
